# Supplementary material for: Assessing the ability of sequence-based methods to provide functional insight within membrane integral proteins: a case study analyzing the neurotransmitter/Na+ symporter family
Source: PubMed Central journal article supplement (PMC2194793; doi:10.1186/1471-2105-8-397), 2007-10-17
Supplement: 1471-2105-8-397-S7.pdf [file 1471-2105-8-397-S7.pdf]

**Sum-of-pairs scores comparing each alignment pair.** The matrix is not exactly symmetrical because the raw scores are divided by the number of aligned pairs within the reference alignment (listed on the vertical).

|                  | <b>MUSCLE</b> | <b>MAFFT</b> | <b>Probalign</b> | <b>Probcons</b> |
|------------------|---------------|--------------|------------------|-----------------|
| <b>MUSCLE</b>    | 1.00          | 0.86         | 0.86             | 0.86            |
| <b>MAFFT</b>     | 0.87          | 1.00         | 0.94             | 0.91            |
| <b>Probalign</b> | 0.87          | 0.94         | 1.00             | 0.91            |
| <b>Probcons</b>  | 0.86          | 0.91         | 0.91             | 1.00            |

**Sensitivity of PM predictions to alignment input.** This table compares the PM functional site predictions across the four different alignments.

| Site                               | Description                                | MUSCLE      | MAFFT       | Probalign   | Probcons    |
|------------------------------------|--------------------------------------------|-------------|-------------|-------------|-------------|
| Arg5                               | Cytoplasmic gate                           |             |             |             |             |
| Trp8                               | Cytoplasmic gate                           |             |             |             |             |
| Gly20                              | Na <sup>+</sup> binding site               | Yes         | Yes         | Yes         | Yes         |
| Asn21                              | Leu binding site                           |             | Yes         | Yes         | Yes         |
| Ala22                              | Leu & Na <sup>+</sup> binding sites        |             | Yes         | Yes         | Yes         |
| Val23                              | Na <sup>+</sup> binding site & unwound TM1 |             | Yes         | Yes         | Yes         |
| Gly24                              | Leu binding site & unwound TM1             |             | Yes         | Yes         | Yes         |
| Leu25                              | Leu binding site                           | Yes         | Yes         | Yes         | Yes         |
| Gly26                              | Leu binding site                           | Yes         | Yes         | Yes         | Yes         |
| Asn27                              | Na <sup>+</sup> binding site               | Yes         | Yes         | Yes         | Yes         |
| Arg30                              | Extracellular gate                         | Yes         | Yes         | Yes         | Yes         |
| Tyr47                              | Extracellular gate                         | Yes         | Yes         | Yes         | Yes         |
| Glu62                              | Stabilizes unwound region in TM6           | Yes         |             |             |             |
| Val104                             | Leu binding site                           |             |             |             |             |
| Tyr108                             | Leu binding site                           |             |             |             |             |
| Gln250                             | Extracellular gate                         | Yes         | Yes         | Yes         | Yes         |
| Phe252                             | Leu binding site                           | Yes         | Yes         | Yes         | Yes         |
| Phe253                             | Leu binding site                           | Yes         | Yes         | Yes         | Yes         |
| Thr254                             | Leu & Na <sup>+</sup> binding sites        | Yes         |             |             |             |
| Ser256                             | Leu binding site & unwound TM6             | Yes         |             |             |             |
| Leu257                             | Unwound TM6                                | Yes         |             |             |             |
| Gly258                             | Unwound TM6                                | Yes         |             |             |             |
| Phe259                             | Leu binding site & unwound TM6             | Yes         |             |             |             |
| Gly260                             | Unwound TM6                                | Yes         |             |             |             |
| Ser267                             | Cytoplasmic gate                           |             | Yes         | Yes         | Yes         |
| Tyr268                             | Cytoplasmic gate                           |             | Yes         | Yes         | Yes         |
| Asn286                             | Na <sup>+</sup> binding site               | Yes         |             |             |             |
| Glu290                             | Extracellular gate                         | Yes         |             |             |             |
| Ala351                             | Na <sup>+</sup> binding site               |             |             |             |             |
| Thr354                             | Na <sup>+</sup> binding site               | Yes         |             |             |             |
| Ser355                             | Leu & Na <sup>+</sup> binding sites        | Yes         |             |             |             |
| Ile359                             | Leu binding site                           |             | Yes         | Yes         | Yes         |
| Asp369                             | Cytoplasmic gate                           |             |             |             |             |
| Asp404                             | Extracellular gate                         | Yes         |             |             |             |
| <b>Number correct</b>              |                                            | <b>21</b>   | <b>16</b>   | <b>16</b>   | <b>16</b>   |
| <b>Total number of predictions</b> |                                            | <b>126</b>  | <b>112</b>  | <b>94</b>   | <b>104</b>  |
| <b>Absolute accuracy</b>           |                                            | <b>0.17</b> | <b>0.14</b> | <b>0.17</b> | <b>0.15</b> |

**Sensitivity of FPE predictions to alignment input.** This table compares the FPE functional site predictions across the four different alignments.

| Site                               | Description                                | MUSCLE      | MAFFT       | Probalign   | Probcons    |
|------------------------------------|--------------------------------------------|-------------|-------------|-------------|-------------|
| Arg5                               | Cytoplasmic gate                           |             |             |             |             |
| Trp8                               | Cytoplasmic gate                           |             |             |             |             |
| Gly20                              | Na <sup>+</sup> binding site               |             |             |             |             |
| Asn21                              | Leu binding site                           |             |             |             |             |
| Ala22                              | Leu & Na <sup>+</sup> binding sites        | Yes         | Yes         | Yes         | Yes         |
| Val23                              | Na <sup>+</sup> binding site & unwound TM1 | Yes         | Yes         | Yes         | Yes         |
| Gly24                              | Leu binding site & unwound TM1             | Yes         | Yes         | Yes         | Yes         |
| Leu25                              | Leu binding site                           | Yes         | Yes         | Yes         | Yes         |
| Gly26                              | Leu binding site                           | Yes         | Yes         | Yes         | Yes         |
| Asn27                              | Na <sup>+</sup> binding site               | Yes         | Yes         | Yes         | Yes         |
| Arg30                              | Extracellular gate                         | Yes         | Yes         | Yes         | Yes         |
| Tyr47                              | Extracellular gate                         | Yes         | Yes         | Yes         | Yes         |
| Glu62                              | Stabilizes unwound region in TM6           | Yes         |             | Yes         | Yes         |
| Val104                             | Leu binding site                           |             |             |             |             |
| Tyr108                             | Leu binding site                           | Yes         | Yes         | Yes         | Yes         |
| Gln250                             | Extracellular gate                         | Yes         | Yes         | Yes         | Yes         |
| Phe252                             | Leu binding site                           | Yes         | Yes         | Yes         | Yes         |
| Phe253                             | Leu binding site                           | Yes         | Yes         | Yes         | Yes         |
| Thr254                             | Leu & Na <sup>+</sup> binding sites        | Yes         | Yes         | Yes         | Yes         |
| Ser256                             | Leu binding site & unwound TM6             | Yes         | Yes         | Yes         | Yes         |
| Leu257                             | Unwound TM6                                |             |             |             |             |
| Gly258                             | Unwound TM6                                |             |             |             |             |
| Phe259                             | Leu binding site & unwound TM6             |             |             |             |             |
| Gly260                             | Unwound TM6                                |             |             |             |             |
| Ser267                             | Cytoplasmic gate                           |             |             |             |             |
| Tyr268                             | Cytoplasmic gate                           |             |             |             |             |
| Asn286                             | Na <sup>+</sup> binding site               |             |             |             |             |
| Glu290                             | Extracellular gate                         |             |             |             |             |
| Ala351                             | Na <sup>+</sup> binding site               | Yes         | Yes         | Yes         | Yes         |
| Thr354                             | Na <sup>+</sup> binding site               | Yes         | Yes         | Yes         | Yes         |
| Ser355                             | Leu & Na <sup>+</sup> binding sites        | Yes         | Yes         | Yes         | Yes         |
| Ile359                             | Leu binding site                           |             |             |             |             |
| Asp369                             | Cytoplasmic gate                           |             |             |             |             |
| Asp404                             | Extracellular gate                         |             |             |             |             |
| <b>Number correct</b>              |                                            | <b>18</b>   | <b>17</b>   | <b>18</b>   | <b>18</b>   |
| <b>Total number of predictions</b> |                                            | <b>51</b>   | <b>51</b>   | <b>51</b>   | <b>51</b>   |
| <b>Absolute accuracy</b>           |                                            | <b>0.35</b> | <b>0.33</b> | <b>0.35</b> | <b>0.35</b> |

**Sensitivity of SC85 predictions to alignment input.** This table compares the SC85 functional site predictions across the four different alignments.

| Site                               | Description                                | MUSCLE      | MAFFT       | Probalign   | Probcons    |
|------------------------------------|--------------------------------------------|-------------|-------------|-------------|-------------|
| Arg5                               | Cytoplasmic gate                           | Yes         | Yes         | Yes         | Yes         |
| Trp8                               | Cytoplasmic gate                           | Yes         | Yes         | Yes         | Yes         |
| Gly20                              | Na <sup>+</sup> binding site               | Yes         | Yes         | Yes         | Yes         |
| Asn21                              | Leu binding site                           |             |             |             |             |
| Ala22                              | Leu & Na <sup>+</sup> binding sites        |             |             |             |             |
| Val23                              | Na <sup>+</sup> binding site & unwound TM1 |             |             |             |             |
| Gly24                              | Leu binding site & unwound TM1             |             |             |             |             |
| Leu25                              | Leu binding site                           | Yes         | Yes         | Yes         | Yes         |
| Gly26                              | Leu binding site                           | Yes         |             |             |             |
| Asn27                              | Na <sup>+</sup> binding site               | Yes         | Yes         | Yes         | Yes         |
| Arg30                              | Extracellular gate                         | Yes         | Yes         | Yes         | Yes         |
| Tyr47                              | Extracellular gate                         | Yes         | Yes         | Yes         | Yes         |
| Glu62                              | Stabilizes unwound region in TM6           | Yes         | Yes         | Yes         | Yes         |
| Val104                             | Leu binding site                           |             |             |             |             |
| Tyr108                             | Leu binding site                           | Yes         | Yes         | Yes         | Yes         |
| Gln250                             | Extracellular gate                         | Yes         | Yes         | Yes         | Yes         |
| Phe252                             | Leu binding site                           | Yes         | Yes         | Yes         | Yes         |
| Phe253                             | Leu binding site                           | Yes         | Yes         | Yes         | Yes         |
| Thr254                             | Leu & Na <sup>+</sup> binding sites        |             |             |             |             |
| Ser256                             | Leu binding site & unwound TM6             |             |             |             |             |
| Leu257                             | Unwound TM6                                |             |             |             |             |
| Gly258                             | Unwound TM6                                |             |             |             |             |
| Phe259                             | Leu binding site & unwound TM6             |             |             |             |             |
| Gly260                             | Unwound TM6                                | Yes         | Yes         | Yes         | Yes         |
| Ser267                             | Cytoplasmic gate                           | Yes         | Yes         | Yes         | Yes         |
| Tyr268                             | Cytoplasmic gate                           | Yes         | Yes         | Yes         | Yes         |
| Asn286                             | Na <sup>+</sup> binding site               | Yes         | Yes         | Yes         | Yes         |
| Glu290                             | Extracellular gate                         |             |             |             |             |
| Ala351                             | Na <sup>+</sup> binding site               |             |             |             |             |
| Thr354                             | Na <sup>+</sup> binding site               |             |             |             |             |
| Ser355                             | Leu & Na <sup>+</sup> binding sites        | Yes         | Yes         | Yes         | Yes         |
| Ile359                             | Leu binding site                           |             |             |             |             |
| Asp369                             | Cytoplasmic gate                           | Yes         | Yes         | Yes         | Yes         |
| Asp404                             | Extracellular gate                         | Yes         | Yes         | Yes         | Yes         |
| <b>Number correct</b>              |                                            | <b>20</b>   | <b>19</b>   | <b>19</b>   | <b>19</b>   |
| <b>Total number of predictions</b> |                                            | <b>58</b>   | <b>53</b>   | <b>55</b>   | <b>55</b>   |
| <b>Accuracy</b>                    |                                            | <b>0.35</b> | <b>0.36</b> | <b>0.35</b> | <b>0.35</b> |

**Sensitivity of Rate4Site predictions to alignment input.** This table compares the Rate4Site (conservation level = 9) functional site predictions across the four different alignments.

| Site                               | Description                                | MUSCLE      | MAFFT       | Probalign   | Probcons    |
|------------------------------------|--------------------------------------------|-------------|-------------|-------------|-------------|
| Arg5                               | Cytoplasmic gate                           |             |             |             |             |
| Trp8                               | Cytoplasmic gate                           |             |             |             |             |
| Gly20                              | Na <sup>+</sup> binding site               | Yes         | Yes         | Yes         | Yes         |
| Asn21                              | Leu binding site                           |             |             |             |             |
| Ala22                              | Leu & Na <sup>+</sup> binding sites        | Yes         | Yes         | Yes         | Yes         |
| Val23                              | Na <sup>+</sup> binding site & unwound TM1 |             |             |             |             |
| Gly24                              | Leu binding site & unwound TM1             | Yes         | Yes         | Yes         | Yes         |
| Leu25                              | Leu binding site                           | Yes         | Yes         | Yes         | Yes         |
| Gly26                              | Leu binding site                           | Yes         | Yes         | Yes         | Yes         |
| Asn27                              | Na <sup>+</sup> binding site               | Yes         | Yes         | Yes         | Yes         |
| Arg30                              | Extracellular gate                         | Yes         | Yes         | Yes         | Yes         |
| Tyr47                              | Extracellular gate                         | Yes         | Yes         | Yes         | Yes         |
| Glu62                              | Stabilizes unwound region in TM6           | Yes         | Yes         | Yes         | Yes         |
| Val104                             | Leu binding site                           |             |             |             |             |
| Tyr108                             | Leu binding site                           | Yes         | Yes         | Yes         | Yes         |
| Gln250                             | Extracellular gate                         | Yes         | Yes         | Yes         | Yes         |
| Phe252                             | Leu binding site                           | Yes         | Yes         | Yes         | Yes         |
| Phe253                             | Leu binding site                           |             |             |             |             |
| Thr254                             | Leu & Na <sup>+</sup> binding sites        |             |             |             |             |
| Ser256                             | Leu binding site & unwound TM6             |             |             |             |             |
| Leu257                             | Unwound TM6                                |             |             |             |             |
| Gly258                             | Unwound TM6                                |             |             |             |             |
| Phe259                             | Leu binding site & unwound TM6             |             |             |             |             |
| Gly260                             | Unwound TM6                                |             |             |             |             |
| Ser267                             | Cytoplasmic gate                           | Yes         | Yes         | Yes         | Yes         |
| Tyr268                             | Cytoplasmic gate                           |             |             |             |             |
| Asn286                             | Na <sup>+</sup> binding site               | Yes         | Yes         | Yes         | Yes         |
| Glu290                             | Extracellular gate                         |             |             |             |             |
| Ala351                             | Na <sup>+</sup> binding site               | Yes         | Yes         | Yes         | Yes         |
| Thr354                             | Na <sup>+</sup> binding site               | Yes         | Yes         | Yes         | Yes         |
| Ser355                             | Leu & Na <sup>+</sup> binding sites        | Yes         | Yes         | Yes         | Yes         |
| Ile359                             | Leu binding site                           |             |             |             |             |
| Asp369                             | Cytoplasmic gate                           |             |             |             |             |
| Asp404                             | Extracellular gate                         |             |             |             |             |
| <b>Number correct</b>              |                                            | <b>17</b>   | <b>17</b>   | <b>17</b>   | <b>17</b>   |
| <b>Total number of predictions</b> |                                            | <b>46</b>   | <b>47</b>   | <b>43</b>   | <b>41</b>   |
| <b>Accuracy</b>                    |                                            | <b>0.37</b> | <b>0.36</b> | <b>0.40</b> | <b>0.42</b> |

**Sensitivity of ET predictions to alignment input.** This table compares the ET (cut level = 12) functional site predictions across the four different alignments.

| Site                               | Description                                | MUSCLE      | MAFFT       | Probalign   | Probcons    |
|------------------------------------|--------------------------------------------|-------------|-------------|-------------|-------------|
| Arg5                               | Cytoplasmic gate                           |             |             |             |             |
| Trp8                               | Cytoplasmic gate                           |             |             |             |             |
| Gly20                              | Na <sup>+</sup> binding site               | Yes         | Yes         | Yes         | Yes         |
| Asn21                              | Leu binding site                           |             |             |             |             |
| Ala22                              | Leu & Na <sup>+</sup> binding sites        |             |             |             |             |
| Val23                              | Na <sup>+</sup> binding site & unwound TM1 |             |             |             |             |
| Gly24                              | Leu binding site & unwound TM1             | Yes         | Yes         | Yes         | Yes         |
| Leu25                              | Leu binding site                           | Yes         | Yes         | Yes         | Yes         |
| Gly26                              | Leu binding site                           |             |             |             |             |
| Asn27                              | Na <sup>+</sup> binding site               | Yes         | Yes         | Yes         | Yes         |
| Arg30                              | Extracellular gate                         | Yes         | Yes         | Yes         | Yes         |
| Tyr47                              | Extracellular gate                         | Yes         | Yes         | Yes         | Yes         |
| Glu62                              | Stabilizes unwound region in TM6           | Yes         | Yes         | Yes         | Yes         |
| Val104                             | Leu binding site                           |             |             |             |             |
| Tyr108                             | Leu binding site                           |             |             |             |             |
| Gln250                             | Extracellular gate                         | Yes         | Yes         | Yes         | Yes         |
| Phe252                             | Leu binding site                           |             |             |             |             |
| Phe253                             | Leu binding site                           |             |             |             |             |
| Thr254                             | Leu & Na <sup>+</sup> binding sites        | Yes         | Yes         | Yes         | Yes         |
| Ser256                             | Leu binding site & unwound TM6             |             |             |             |             |
| Leu257                             | Unwound TM6                                |             |             |             |             |
| Gly258                             | Unwound TM6                                |             |             |             |             |
| Phe259                             | Leu binding site & unwound TM6             |             |             |             |             |
| Gly260                             | Unwound TM6                                | Yes         | Yes         | Yes         | Yes         |
| Ser267                             | Cytoplasmic gate                           | Yes         | Yes         | Yes         | Yes         |
| Tyr268                             | Cytoplasmic gate                           | Yes         | Yes         | Yes         | Yes         |
| Asn286                             | Na <sup>+</sup> binding site               |             |             |             |             |
| Glu290                             | Extracellular gate                         |             |             |             |             |
| Ala351                             | Na <sup>+</sup> binding site               | Yes         | Yes         | Yes         | Yes         |
| Thr354                             | Na <sup>+</sup> binding site               | Yes         | Yes         | Yes         | Yes         |
| Ser355                             | Leu & Na <sup>+</sup> binding sites        |             |             |             |             |
| Ile359                             | Leu binding site                           |             |             |             |             |
| Asp369                             | Cytoplasmic gate                           | Yes         | Yes         | Yes         |             |
| Asp404                             | Extracellular gate                         |             |             |             |             |
| <b>Number correct</b>              |                                            | <b>15</b>   | <b>15</b>   | <b>15</b>   | <b>14</b>   |
| <b>Total number of predictions</b> |                                            | <b>56</b>   | <b>50</b>   | <b>62</b>   | <b>55</b>   |
| <b>Accuracy</b>                    |                                            | <b>0.27</b> | <b>0.30</b> | <b>0.24</b> | <b>0.26</b> |

**Sensitivity of SDP predictions to alignment input.** This table compares the SDPpred (z-score threshold = 6) functional site predictions across the four different alignments.

| Site                               | Description                                | MUSCLE      | MAFFT       | Probalign   | Probcons    |
|------------------------------------|--------------------------------------------|-------------|-------------|-------------|-------------|
| Arg5                               | Cytoplasmic gate                           |             |             |             |             |
| Trp8                               | Cytoplasmic gate                           |             |             |             |             |
| Gly20                              | a <sup>+</sup> binding site                |             |             |             |             |
| Asn21                              | Leu binding site                           |             |             |             |             |
| Ala22                              | Leu & Na <sup>+</sup> binding sites        |             |             |             |             |
| Val23                              | Na <sup>+</sup> binding site & unwound TM1 |             |             |             |             |
| Gly24                              | Leu binding site & unwound TM1             | Yes         | Yes         | Yes         | Yes         |
| Leu25                              | Leu binding site                           |             |             |             |             |
| Gly26                              | Leu binding site                           |             |             |             |             |
| Asn27                              | Na <sup>+</sup> binding site               |             |             |             |             |
| Arg30                              | Extracellular gate                         |             |             |             |             |
| Tyr47                              | Extracellular gate                         |             |             |             |             |
| Glu62                              | Stabilizes unwound region in TM6           |             |             |             |             |
| Val104                             | Leu binding site                           |             |             |             |             |
| Tyr108                             | Leu binding site                           |             |             |             |             |
| Gln250                             | Extracellular gate                         |             |             |             |             |
| Phe252                             | Leu binding site                           |             |             |             |             |
| Phe253                             | Leu binding site                           |             |             |             |             |
| Thr254                             | Leu & Na <sup>+</sup> binding sites        |             |             |             |             |
| Ser256                             | Leu binding site & unwound TM6             | Yes         | Yes         | Yes         | Yes         |
| Leu257                             | Unwound TM6                                |             |             |             |             |
| Gly258                             | Unwound TM6                                |             |             |             |             |
| Phe259                             | Leu binding site & unwound TM6             |             |             |             |             |
| Gly260                             | Unwound TM6                                |             |             |             |             |
| Ser267                             | Cytoplasmic gate                           |             |             |             |             |
| Tyr268                             | Cytoplasmic gate                           |             |             |             |             |
| Asn286                             | Na <sup>+</sup> binding site               |             |             |             |             |
| Glu290                             | Extracellular gate                         |             |             |             |             |
| Ala351                             | Na <sup>+</sup> binding site               | Yes         | Yes         | Yes         | Yes         |
| Thr354                             | Na <sup>+</sup> binding site               | Yes         | Yes         | Yes         | Yes         |
| Ser355                             | Leu & Na <sup>+</sup> binding sites        |             |             |             |             |
| Ile359                             | Leu binding site                           |             |             |             |             |
| Asp369                             | Cytoplasmic gate                           |             |             |             |             |
| Asp404                             | Extracellular gate                         |             |             |             |             |
| <b>Number correct</b>              |                                            | <b>4</b>    | <b>4</b>    | <b>4</b>    | <b>4</b>    |
| <b>Total number of predictions</b> |                                            | <b>15</b>   | <b>17</b>   | <b>18</b>   | <b>21</b>   |
| <b>Accuracy</b>                    |                                            | <b>0.26</b> | <b>0.24</b> | <b>0.22</b> | <b>0.19</b> |
